# Supplementary material
Source: publisher figshare collection journal article supplement (https://future-science-group.figshare.com/articles/dataset/_/21429486)
Supplement: Supplementary file 3 [file 1]

|                                                                 |             |             |             |              |             |             |             |             |      |
|-----------------------------------------------------------------|-------------|-------------|-------------|--------------|-------------|-------------|-------------|-------------|------|
| HBV/H Genome-Consensus<br>pHY-H2<br>pHY-H6<br>pHY-H8<br>pHY-H10 | CTCAACACAG  | TTCCACCAAG  | CACTGTTGGA  | TCCGAGAGTA   | AGGGGTCTGT  | ATTTTCTCTG  | TGGTGGCTCC  | AGTTTCAGAAA | 30   |
|                                                                 | .....       | .....       | .....       | C.....A..... | .....       | .....       | .....       | .....       | 40   |
|                                                                 | .....       | .....       | .....       | C.....A..... | .....       | .....       | .....       | .....       | 60   |
|                                                                 | .....       | .....       | .....       | C.....A..... | .....       | .....       | .....       | .....       | 80   |
|                                                                 | .....       | .....       | .....       | C.....A..... | .....       | .....       | .....       | .....       | 100  |
| HBV/H Genome-Consensus<br>pHY-H2<br>pHY-H6<br>pHY-H8<br>pHY-H10 | CACAGAACC   | TGCTCCGAC   | ATTGCCTCTC  | TCACATCAT    | AATCTTCTCG  | AAGAETGGG   | ACCECTGCTAT | GAACATGGA   | 120  |
|                                                                 | .....       | .....       | .....T..... | .....        | .....       | .....       | .....       | .....       | 140  |
|                                                                 | .....       | .....       | .....T..... | .....        | .....       | .....       | .....       | .....       | 160  |
|                                                                 | .....       | .....       | .....T..... | .....        | .....       | .....       | .....       | .....       | 180  |
|                                                                 | .....       | .....       | .....T..... | .....        | .....       | .....       | .....       | .....       | 200  |
| HBV/H Genome-Consensus<br>pHY-H2<br>pHY-H6<br>pHY-H8<br>pHY-H10 | AACATCACAT  | CAGGACTCCT  | AGGACCCCTT  | CTCGTGTTAC   | AGGCGGTGTG  | TTTCTTGTTG  | ACAAAAATCC  | TCACAATACC  | 220  |
|                                                                 | .....       | .....       | .....       | .....        | .....       | .....       | .....       | .....       | 240  |
|                                                                 | .....       | .....       | .....       | .....        | .....       | .....       | .....       | .....       | 260  |
|                                                                 | .....       | .....       | .....       | .....        | .....       | .....       | .....       | .....       | 280  |
|                                                                 | .....       | .....       | .....       | .....        | .....       | .....       | .....       | .....       | 300  |
| HBV/H Genome-Consensus<br>pHY-H2<br>pHY-H6<br>pHY-H8<br>pHY-H10 | ACAGAGTCTA  | GACTCTGGG   | GGACTTCTCT  | CAATTTTCTA   | GGGGTACCAC  | CCGGGTGTCT  | TGGCCAAAAT  | TCGCAGTCCC  | 320  |
|                                                                 | .....       | .....       | .....       | .....        | .....       | .....       | .....G..... | .....       | 340  |
|                                                                 | .....       | .....       | .....       | .....        | .....       | .....       | .....G..... | .....       | 360  |
|                                                                 | .....       | .....       | .....       | .....        | .....       | .....       | .....G..... | .....       | 380  |
|                                                                 | .....       | .....       | .....       | .....        | .....       | .....       | .....G..... | .....       | 400  |
| HBV/H Genome-Consensus<br>pHY-H2<br>pHY-H6<br>pHY-H8<br>pHY-H10 | CAATCTCCAA  | TCACCTTACC  | ACCTCCTGTC  | CTCCAACCTG   | TCCTGGCTAT  | CGTTGGAATG  | GTCTGCGGGC  | TTTTATCATC  | 420  |
|                                                                 | .....       | .....       | .....       | .....        | .....       | .....       | .....       | .....       | 440  |
|                                                                 | .....       | .....       | .....       | .....        | .....       | .....       | .....       | .....       | 460  |
|                                                                 | .....       | .....       | .....       | .....        | .....       | .....       | .....       | .....       | 480  |
|                                                                 | .....       | .....       | .....       | .....        | .....       | .....       | .....       | .....       | 500  |
| HBV/H Genome-Consensus<br>pHY-H2<br>pHY-H6<br>pHY-H8<br>pHY-H10 | TTCTCTTTCA  | TCCTGCTGG   | ATGCCTCATC  | TTCTTGTTTG   | TTCTTCTGGA  | CTATCAAGGT  | ATGTTGCCCG  | TGTGTCTCTC  | 520  |
|                                                                 | .....       | .....       | .....       | .....        | .....       | .....       | .....       | .....       | 540  |
|                                                                 | .....       | .....       | .....       | .....        | .....       | .....       | .....       | .....       | 560  |
|                                                                 | .....       | .....       | .....       | .....        | .....       | .....       | .....       | .....       | 580  |
|                                                                 | .....       | .....       | .....       | .....        | .....       | .....       | .....       | .....       | 600  |
| HBV/H Genome-Consensus<br>pHY-H2<br>pHY-H6<br>pHY-H8<br>pHY-H10 | ACTTCCAGGA  | TCTACAACCA  | CCAGCACGGG  | ACCTTGCAAA   | ACCTGCACCA  | CTCTTGCTCA  | AGGAACCTCT  | ATGTTTCCCT  | 620  |
|                                                                 | .....       | .....A..... | .....       | .....        | .....       | .....       | .....       | .....       | 640  |
|                                                                 | .....       | .....A..... | .....       | .....        | .....       | .....       | .....       | .....       | 660  |
|                                                                 | .....       | .....A..... | .....       | .....        | .....       | .....       | .....       | .....       | 680  |
|                                                                 | .....       | .....A..... | .....       | .....        | .....       | .....       | .....       | .....       | 700  |
| HBV/H Genome-Consensus<br>pHY-H2<br>pHY-H6<br>pHY-H8<br>pHY-H10 | CCTGCTGCTG  | TACCAAACT   | TCGGACGGAA  | ATTGCACTTG   | TATTCCCATC  | CCATCATCTT  | GGGCTTTTCG  | AAAATACCTA  | 720  |
|                                                                 | .....       | .....       | .....       | .....        | .....       | .....       | .....       | .....       | 740  |
|                                                                 | .....       | .....       | .....       | .....        | .....       | .....       | .....       | .....       | 760  |
|                                                                 | .....       | .....       | .....       | .....        | .....       | .....       | .....       | .....       | 780  |
|                                                                 | .....       | .....       | .....       | .....        | .....       | .....       | .....       | .....       | 800  |
| HBV/H Genome-Consensus<br>pHY-H2<br>pHY-H6<br>pHY-H8<br>pHY-H10 | TGGGAGTGGG  | CCTCAGCCCG  | TTTCTCTTGG  | CTCAGTTTAC   | TAGTGCAATT  | TGTTCAGTGG  | TGCGTAGGGC  | TTTCCCCCAC  | 820  |
|                                                                 | .....       | .....       | .....       | .....        | .....       | .....       | .....       | .....       | 840  |
|                                                                 | .....       | .....       | .....       | .....        | .....       | .....       | .....       | .....       | 860  |
|                                                                 | .....       | .....       | .....       | .....        | .....       | .....       | .....       | .....       | 880  |
|                                                                 | .....       | .....       | .....       | .....        | .....       | .....       | .....       | .....       | 900  |
| HBV/H Genome-Consensus<br>pHY-H2<br>pHY-H6<br>pHY-H8<br>pHY-H10 | TGTCTGGCTT  | TTAGTTTATA  | GGATGATTTG  | GTATTGGGGG   | CCAAATCTGT  | GCAGCATCTT  | GAGTCCCTTT  | ATACCGCTGT  | 920  |
|                                                                 | .....       | .....       | .....       | .....        | .....       | .....       | .....       | .....       | 940  |
|                                                                 | .....       | .....       | .....       | .....        | .....       | .....       | .....       | .....       | 960  |
|                                                                 | .....       | .....       | .....       | .....        | .....       | .....       | .....       | .....       | 980  |
|                                                                 | .....       | .....       | .....       | .....        | .....       | .....       | .....       | .....       | 1000 |
| HBV/H Genome-Consensus<br>pHY-H2<br>pHY-H6<br>pHY-H8<br>pHY-H10 | TACCAATTTT  | TTGTTATCTG  | TGGGCATCCA  | TTTGAACACA   | GCTAAAACAA  | AATGGTGGGG  | TTATTCTTTA  | CACTTTATGG  | 1020 |
|                                                                 | .....       | .....       | .....       | .....A.....  | .....       | .....       | .....       | .....       | 1040 |
|                                                                 | .....       | .....       | .....       | .....A.....  | .....       | .....       | .....       | .....       | 1060 |
|                                                                 | .....       | .....       | .....       | .....A.....  | .....       | .....       | .....       | .....       | 1080 |
|                                                                 | .....       | .....       | .....       | .....A.....  | .....       | .....       | .....       | .....       | 1100 |
| HBV/H Genome-Consensus<br>pHY-H2<br>pHY-H6<br>pHY-H8<br>pHY-H10 | GTTATATAAT  | TGGGAGTTGG  | GGGACCTTGC  | CTCAGGAACA   | TATTGTGCAT  | AAAATCAAAG  | ATTGCTTTTC  | CAAACCTTCC  | 1120 |
|                                                                 | .....       | .....       | .....G..... | .....        | .....A..... | .....       | .....       | .....       | 1140 |
|                                                                 | .....       | .....       | .....G..... | .....        | .....A..... | .....       | .....       | .....       | 1160 |
|                                                                 | .....       | .....       | .....G..... | .....        | .....A..... | .....       | .....       | .....       | 1180 |
|                                                                 | .....       | .....       | .....G..... | .....        | .....A..... | .....       | .....       | .....       | 1200 |
| HBV/H Genome-Consensus<br>pHY-H2<br>pHY-H6<br>pHY-H8<br>pHY-H10 | GTGAATAGAC  | CCATTGATTG  | GAAGGTTTGT  | CAACGCATTG   | TGGGTCCTTT  | GGGCTTTTGA  | GCCCTTTTAA  | CTCAATGTGG  | 1220 |
|                                                                 | .....       | .....       | .....       | .....A.....  | .....       | .....       | .....       | .....       | 1240 |
|                                                                 | .....       | .....       | .....       | .....A.....  | .....       | .....       | .....       | .....       | 1260 |
|                                                                 | .....       | .....       | .....       | .....A.....  | .....       | .....       | .....       | .....       | 1280 |
|                                                                 | .....       | .....       | .....       | .....A.....  | .....       | .....       | .....       | .....       | 1300 |
| HBV/H Genome-Consensus<br>pHY-H2<br>pHY-H6<br>pHY-H8<br>pHY-H10 | TTATCTGTCT  | CTCATGCCCT  | TGTATGCCTG  | TATTACGGCT   | AAGCAGGCTT  | TTGTTTCTCT  | GCCCACTTAC  | AAGGCTTTTC  | 1320 |
|                                                                 | .....C..... | .....       | .....       | .....        | .....       | .....       | .....       | .....       | 1340 |
|                                                                 | .....C..... | .....       | .....       | .....        | .....       | .....       | .....       | .....       | 1360 |
|                                                                 | .....C..... | .....       | .....       | .....        | .....       | .....       | .....       | .....       | 1380 |
|                                                                 | .....C..... | .....       | .....       | .....        | .....       | .....       | .....       | .....       | 1400 |
| HBV/H Genome-Consensus<br>pHY-H2<br>pHY-H6<br>pHY-H8<br>pHY-H10 | TCTGTAAACA  | ATACATGAAC  | CTTTACCCCG  | TTGCTCGGCA   | ACGGCCAGGC  | CTTTGCCAAG  | TGTTTGCTGA  | CGCAACCCCG  | 1420 |
|                                                                 | .....       | .....       | .....       | .....        | .....       | .....       | .....       | .....       | 1440 |
|                                                                 | .....       | .....       | .....       | .....        | .....       | .....       | .....       | .....       | 1460 |
|                                                                 | .....       | .....       | .....       | .....        | .....       | .....       | .....       | .....       | 1480 |
|                                                                 | .....       | .....       | .....       | .....        | .....       | .....       | .....       | .....       | 1500 |
| HBV/H Genome-Consensus<br>pHY-H2<br>pHY-H6<br>pHY-H8<br>pHY-H10 | ACTGGCTGGG  | GCTTGGCGAT  | TGGCCATCAG  | CGCATGCGCG   | GAACCTTTGT  | GGCTCCTCTG  | CCGATCCATA  | CTGCGGAAC   | 1520 |
|                                                                 | .....       | .....       | .....       | .....        | .....       | .....       | .....       | .....       | 1540 |
|                                                                 | .....       | .....       | .....       | .....        | .....       | .....       | .....       | .....       | 1560 |
|                                                                 | .....       | .....       | .....       | .....        | .....       | .....       | .....       | .....       | 1580 |
|                                                                 | .....       | .....       | .....       | .....        | .....       | .....       | .....       | .....       | 1600 |
| HBV/H Genome-Consensus<br>pHY-H2<br>pHY-H6<br>pHY-H8<br>pHY-H10 | CCTAGCAGCT  | TGTTTCGCTC  | GCAGCAGGTC  | TGGAGCGGAC   | ATTATCGGCA  | CTGACAACTC  | CGTTGTCTTT  | TCTCGGAAGT  | 1620 |
|                                                                 | .....       | .....       | .....       | .....        | .....       | .....       | .....A..... | .....       | 1640 |
|                                                                 | .....       | .....       | .....       | .....        | .....       | .....       | .....A..... | .....       | 1660 |
|                                                                 | .....       | .....       | .....       | .....        | .....       | .....       | .....A..... | .....       | 1680 |
|                                                                 | .....       | .....       | .....       | .....        | .....       | .....       | .....A..... | .....       | 1700 |
| HBV/H Genome-Consensus<br>pHY-H2<br>pHY-H6<br>pHY-H8<br>pHY-H10 | ACACCTCCTT  | CCCATGGCTG  | CTAGGCTGTG  | CTGCCAACTG   | GATCCTGCGC  | GGGACGTCCT  | TTGTCTACGT  | CCCCTCGGCG  | 1720 |
|                                                                 | .....       | .....       | .....       | .....        | .....       | .....       | .....       | .....A..... | 1740 |
|                                                                 | .....       | .....       | .....       | .....        | .....       | .....       | .....       | .....A..... | 1760 |
|                                                                 | .....       | .....       | .....       | .....        | .....       | .....       | .....       | .....A..... | 1780 |
|                                                                 | .....       | .....       | .....       | .....        | .....       | .....       | .....       | .....A..... | 1800 |
| HBV/H Genome-Consensus<br>pHY-H2<br>pHY-H6<br>pHY-H8<br>pHY-H10 | CTGAATCCTG  | CGGACGACCC  | CTCTCGTGGT  | CGCTTGGGGC   | TCTGCGCGCC  | TCTTCTCCGC  | CTGCCGTTCC  | GGCCGACGAC  | 1820 |
|                                                                 | .....       | .....       | .....       | .....        | .....       | .....       | .....       | .....       | 1840 |
|                                                                 | .....       | .....       | .....       | .....        | .....       | .....       | .....       | .....       | 1860 |
|                                                                 | .....       | .....       | .....       | .....        | .....       | .....       | .....       | .....       | 1880 |
|                                                                 | .....       | .....       | .....       | .....        | .....       | .....       | .....       | .....       | 1900 |
| HBV/H Genome-Consensus<br>pHY-H2<br>pHY-H6<br>pHY-H8<br>pHY-H10 | GGGTGCGACC  | TCTCTTTACG  | CGGACTCCCC  | GCCTGTGCCT   | TCTCATCTGC  | CGGCCCGTGT  | GCACTTCGCT  | TCACCTCTGC  | 1920 |
|                                                                 | .....       | .....       | .....       | .....        | .....       | .....       | .....       | .....       | 1940 |
|                                                                 | .....       | .....       | .....       | .....        | .....       | .....       | .....       | .....       | 1960 |
|                                                                 | .....       | .....       | .....       | .....        | .....       | .....       | .....       | .....       | 1980 |
|                                                                 | .....       | .....       | .....       | .....        | .....       | .....       | .....       | .....       | 2000 |
| HBV/H Genome-Consensus<br>pHY-H2<br>pHY-H6<br>pHY-H8<br>pHY-H10 | ACGTCGCATG  | GAGACCACCG  | TGAACGCCCC  | TTGGAACCTG   | CCAACAACCT  | TACATAAGAG  | GACTCTTGGA  | CTTTCGCCCC  | 2020 |
|                                                                 | .....       | .....       | .....       | .....C.....  | .....       | .....       | .....       | .....       | 2040 |
|                                                                 | .....       | .....       | .....       | .....CA..... | .....       | .....       | .....       | .....       | 2060 |
|                                                                 | .....       | .....       | .....       | .....CA..... | .....       | .....       | .....       | .....       | 2080 |
|                                                                 | .....       | .....       | .....       | .....CA..... | .....       | .....       | .....       | .....       | 2100 |
| HBV/H Genome-Consensus<br>pHY-H2<br>pHY-H6<br>pHY-H8<br>pHY-H10 | GGTCAACGAC  | CTGGATTGAG  | GAATACATCA  | AAGACTGTGT   | ATTTAAGGAC  | TGGGAGGAGT  | CGGGGGAGGA  | GTTGAGGTTA  | 2120 |
|                                                                 | .....       | .....       | .....       | .....        | .....       | .....       | .....       | .....       | 2140 |
|                                                                 | .....       | .....       | .....       | .....        | .....       | .....       | .....       | .....       | 2160 |
|                                                                 | .....       | .....       | .....       | .....        | .....       | .....       | .....       | .....       | 2180 |
|                                                                 | .....       | .....       | .....       | .....        | .....       | .....       | .....       | .....       | 2200 |
| HBV/H Genome-Consensus<br>pHY-H2<br>pHY-H6<br>pHY-H8<br>pHY-H10 | AAGGTCCTTG  | TATTAGGAGG  | CTGTAGGCAT  | AAATTGCTCT   | GTTCAACAGC  | ACCATGCAAC  | TTTTTCACCT  | CTGCCTAATC  | 2220 |
|                                                                 | .....       | .....       | .....       | .....        | .....       | .....       | .....       | .....       | 2240 |
|                                                                 | .....       | .....       | .....       | .....        | .....       | .....       | .....       | .....       | 2260 |
|                                                                 | .....       | .....       | .....       | .....        | .....       | .....       | .....       | .....       | 2280 |
|                                                                 | .....       | .....       | .....       | .....        | .....       | .....       | .....       | .....       | 2300 |
| HBV/H Genome-Consensus<br>pHY-H2<br>pHY-H6<br>pHY-H8<br>pHY-H10 | ATCTTTTGTT  | CATGTCCAC   | TGTTCAAGCC  | TCCAAGCTGT   | GCCTTGGGTG  | GCTTGGGGC   | ATGGACATTG  | ACCCTTATAA  | 2320 |
|                                                                 | .....       | .....       | .....       | .....        | .....       | .....       | .....       | .....       | 2340 |
|                                                                 | .....       | .....       | .....       | .....        | .....       | .....       | .....       | .....       | 2360 |
|                                                                 | .....       | .....       | .....       | .....        | .....       | .....       | .....       | .....       | 2380 |
|                                                                 | .....       | .....       | .....       | .....        | .....       | .....       | .....       | .....       | 2400 |
| HBV/H Genome-Consensus<br>pHY-H2<br>pHY-H6<br>pHY-H8<br>pHY-H10 | AGAATTTGGA  | GCTTCTGTGG  | AGTTACTCTC  | ATTTTGGCTT   | TCTGACTTCT  | TCCCGTCTGT  | CCGGGACCTA  | CTCGACACCG  | 2420 |
|                                                                 | .....       | .....       | .....       | .....        | .....       | .....       | .....       | .....       | 2440 |
|                                                                 | .....       | .....       | .....       | .....        | .....       | .....       | .....       | .....       | 2460 |
|                                                                 | .....       | .....       | .....       | .....        | .....       | .....       | .....       | .....       | 2480 |
|                                                                 | .....       | .....       | .....       | .....        | .....       | .....       | .....       | .....       | 2500 |
| HBV/H Genome-Consensus<br>pHY-H2<br>pHY-H6<br>pHY-H8<br>pHY-H10 | CTTCAGCCCT  | CTACCGAGAT  | GCCTTAGAAT  | CACCCGAACA   | TGCAACCCC   | AACCACACTG  | CTCTCAGGCA  | AGCTATTTTG  | 2520 |
|                                                                 | .....       | .....       | .....       | .....        | .....       | .....T..... | .....       | .....       | 2540 |
|                                                                 | .....       | .....       | .....       | .....        | .....       | .....T..... | .....       | .....       | 2560 |
|                                                                 | .....       | .....       | .....       | .....        | .....       | .....T..... | .....       | .....       | 2580 |
|                                                                 | .....       | .....       | .....       | .....        | .....       | .....T..... | .....       | .....       | 2600 |
| HBV/H Genome-Consensus<br>pHY-H2<br>pHY-H6<br>pHY-H8<br>pHY-H10 | TGCTGGGGTG  | AGTTGATGAC  | CTTGGCTTCC  | TGGGTGGGCA   | ATAATTTAGA  | GGATCCTGCA  | GCAAGAGATC  | TAGTAGTTAA  | 2620 |
|                                                                 | .....       | .....       | .....       | .....        | .....       | .....       | .....C..... | .....       | 2640 |
|                                                                 | .....       | .....       | .....       | .....        | .....       | .....       | .....C..... | .....       | 2660 |
|                                                                 | .....       | .....       | .....       | .....        | .....       | .....       | .....C..... | .....       | 2680 |
|                                                                 | .....       | .....       | .....       | .....        | .....       | .....       | .....C..... | .....       | 2700 |
| HBV/H Genome-Consensus<br>pHY-H2<br>pHY-H6<br>pHY-H8<br>pHY-H10 | TTATGTCAAT  | ACTAACATGG  | GCCTAAAAAT  | TAGACAATTA   | TTATGGTTTC  | ACATTTCTCT  | CCTTACATTT  | GGAAGAGAAA  | 2720 |
|                                                                 | .....       | .....T..... | .....       | .....        | .....       | .....T..... | .....       | .....       | 2740 |
|                                                                 | .....       | .....T..... | .....       | .....        | .....       | .....T..... | .....       | .....       | 2760 |
|                                                                 | .....       | .....T..... | .....       | .....        | .....       | .....T..... | .....       | .....       | 2780 |
|                                                                 | .....       | .....T..... | .....       | .....        | .....       | .....T..... | .....       | .....       | 2800 |
| HBV/H Genome-Consensus<br>pHY-H2<br>pHY-H6<br>pHY-H8<br>pHY-H10 | CTGTGCTTGA  | GTATTTGGTG  | TCTTTTGGAG  | TGTGATTCTG   | CACTCCACCT  | GCTTATAGAC  | CACCAAAATG  | CCCTATCTCT  | 2820 |
|                                                                 | .....       | .....       | .....       | .....        | .....       | .....       | .....G..... | .....       | 2840 |
|                                                                 | .....       | .....       | .....       | .....        | .....       | .....       | .....G..... | .....       | 2860 |
|                                                                 | .....       | .....       | .....       | .....        | .....       | .....       | .....G..... | .....       | 2880 |
|                                                                 | .....       | .....       | .....       | .....        | .....       | .....       | .....G..... | .....       | 2900 |
| HBV/H Genome-Consensus<br>pHY-H2<br>pHY-H6<br>pHY-H8<br>pHY-H10 | TCAACACTTC  | CGGAGACTAC  | TGTTGTTAGA  | CAACGAGGCA   | GGGCCCTTAG  | AAGAAGAACT  | CCCTCGCCTC  | GCAGACGAAG  | 2920 |
|                                                                 | .....       | .....       | .....       | .....        | .....       | .....       | .....C..... | .....       | 2940 |
|                                                                 | .....       | .....       | .....       | .....        | .....       | .....       | .....       | .....       | 2960 |
|                                                                 | .....       | .....       | .....       | .....        | .....       | .....       | .....       | .....       | 2980 |
|                                                                 | .....       | .....       | .....       | .....        | .....       | .....       | .....       | .....       | 3000 |
| HBV/H Genome-Consensus<br>pHY-H2<br>pHY-H6<br>pHY-H8<br>pHY-H10 | ATCTCAATCA  | CCGCGTCGCA  | GAAGATCTCA  | ATCTCCAGCT   | TCCCAATGTT  | AGTATTCCTT  | GGACTCATAA  | GGTGGGAAAC  | 3020 |
|                                                                 | .....       | .....       | .....       | .....        | .....       | .....       | .....       | .....       | 3040 |
|                                                                 | .....       | .....       | .....       | .....        | .....       | .....       | .....       | .....       | 3060 |
|                                                                 | .....       | .....       | .....       | .....        | .....       | .....       | .....       | .....       | 3080 |
|                                                                 | .....       | .....       | .....       | .....        | .....       | .....       | .....       | .....       | 3100 |
| HBV/H Genome-Consensus<br>pHY-H2<br>pHY-H6<br>pHY-H8<br>pHY-H10 | TTTACCGGTC  | TTTACTCCTC  | TACTGTACCT  | GTTTTCAATC   | CTGACTGGTT  | AACTCCTTCT  | TTTCTGACA   | TTCACTTGCA  | 3120 |
|                                                                 | .....       | .....       | .....       | .....        | .....       | .....       | .....       | .....       | 3140 |
|                                                                 | .....       | .....       | .....       | .....        | .....       | .....       | .....       | .....       | 3160 |
|                                                                 | .....       | .....       | .....       | .....        | .....       | .....       | .....       | .....       | 3180 |
|                                                                 | .....       | .....       | .....       | .....        | .....       | .....       | .....       | .....       | 3200 |
| HBV/H Genome-Consensus<br>pHY-H2<br>pHY-H6<br>pHY-H8<br>pHY-H10 | TCAAGATCTG  | ATACAAAAAT  | GTGAACAAAT  | TGTAGGCCCA   | CTCACTACAA  | ATGAAAGGAG  | ACGATTGAAA  | CTAATTATGC  | 3220 |
|                                                                 | .....       | .....T..... | .....       | .....        | .....A..... | .....       | .....       | .....       | 3240 |
|                                                                 | .....       | .....T..... | .....       |              |             |             |             |             |      |
